# Supplementary material for: Directed Evolution of 4-Hydroxyphenylpyruvate Biosensors Based on a Dual Selection System
Source: MDPI journal article supplement (doi:10.3390/ijms25031533), 2024-01-26
Supplement: s1 [file s1]

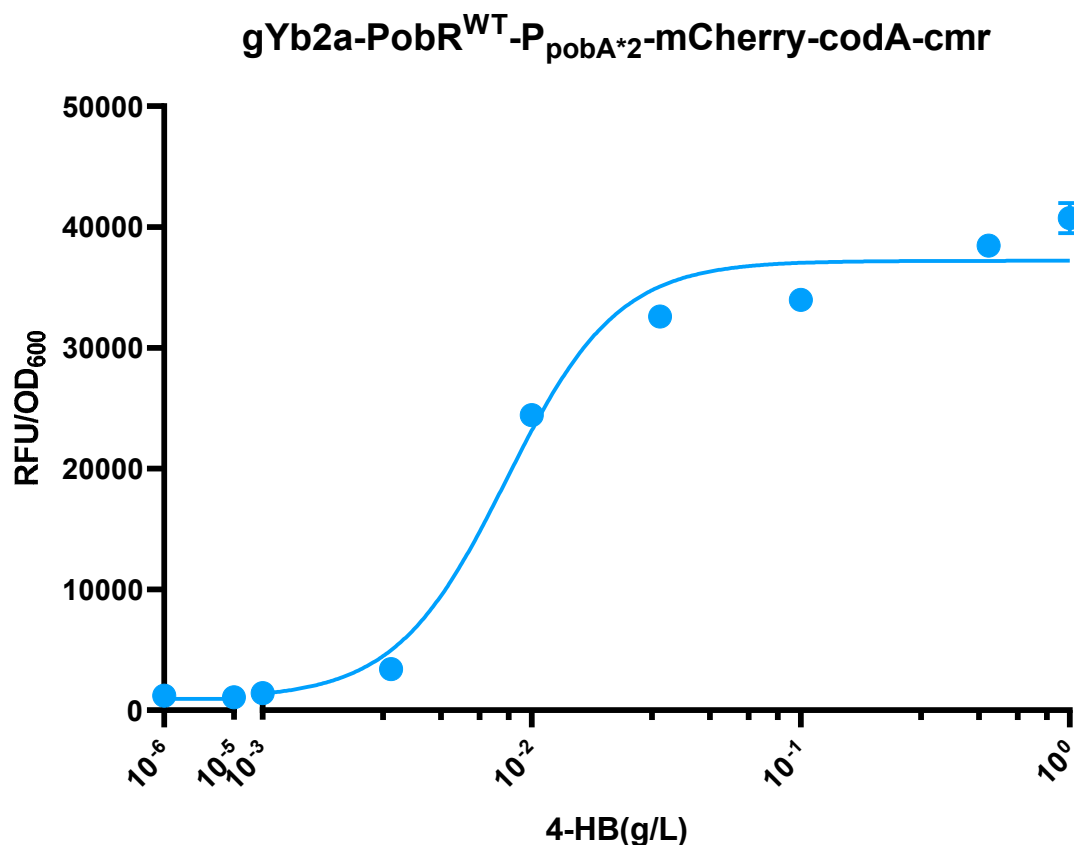

**Supplementary Figure S1.** The dynamic range of the PobR<sup>WT</sup> Biosensor (in *E. coli* BWΔ*codA*) responsive to 4HB. The vertical axis is the ratio of the reporter gene *mCherry* (RFU) expression to the growth of *E. coli* (OD<sub>600</sub>), measured after a 12 h of cultivation in M9 medium. Each value represents the mean ± standard deviation from 3 biological replicates.

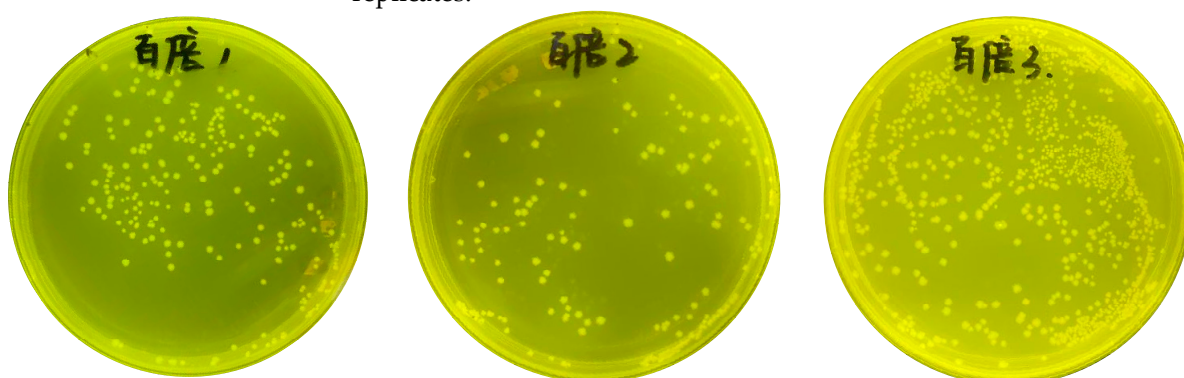

**Supplementary Figure S2.** Clone calculation after passing two rounds of negative selection in medium containing 50 mg/L and 200 mg/L 5-FC using the dilution coating method. The experimental procedure includes aspirating 50 μl of the selected bacterial solution, adding it into 5000 μl of LB medium (i.e., 1:100 dilution), and then taking 50 μl of the diluted bacteria to spread onto a plate. Based on our calculation, the original density of the two-round selected bacteria was 450,000 CFU/mL (The three different black markings on the plates

represent three different biological replicates for colony counting at 1:100 dilution).

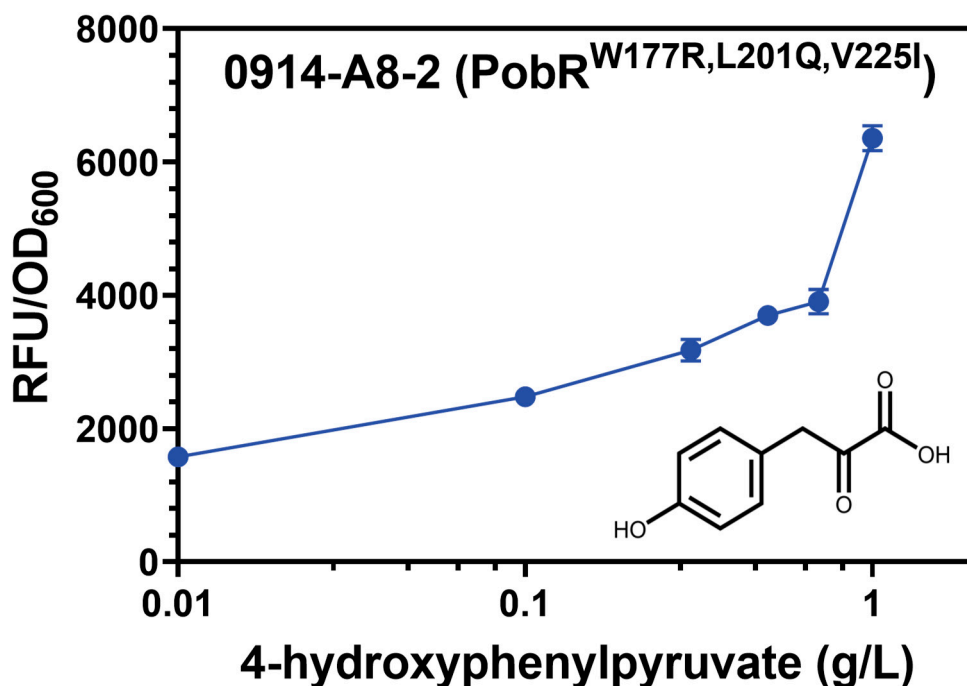

**Supplementary Figure S3.** Range curve of PobR<sup>W177R, L201Q, V225I</sup> response to HPP. The vertical axis is the ratio of reporter gene mCherry (RFU) expression to *E. coli* (OD 600) growth measured after 12 hours of culture in M9 medium with different concentrations of HPP. Each value represents the mean  $\pm$  standard deviation of 3 biological replicates.

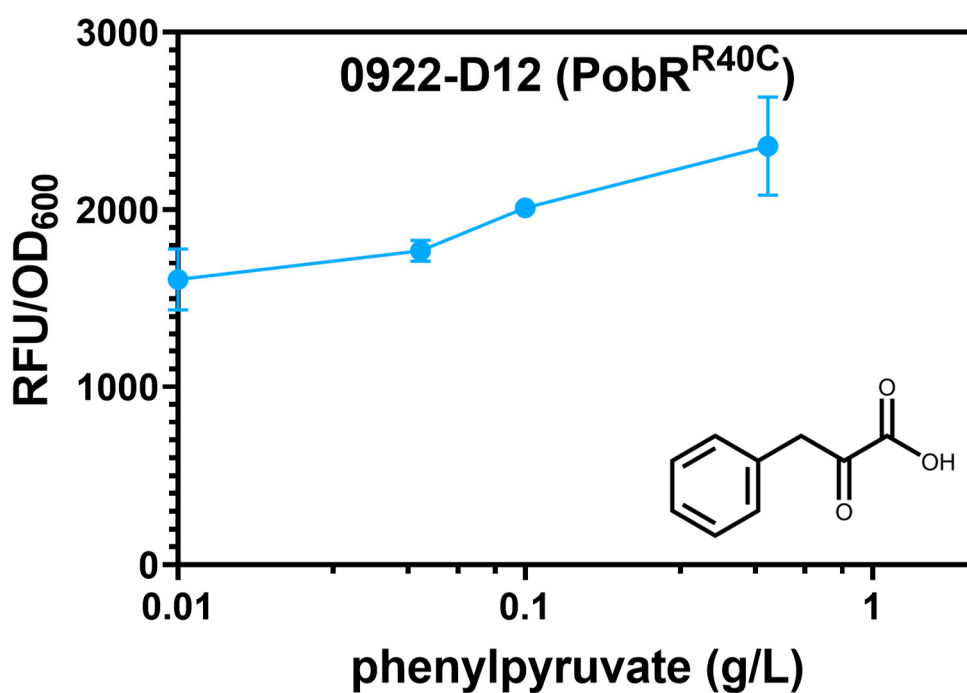

**Supplementary Figure S4.** Range curve of PobR<sup>R40C</sup> response to PPA. The vertical axis is the ratio of reporter gene mCherry (RFU)

expression to *E. coli* (OD 600) growth measured after 12 hours of culture in M9 medium with different concentrations of PPA. Each value represents the mean  $\pm$  standard deviation of 3 biological replicates.

**a** **Hydrophobic Interactions** ....

| Index | Residue | AA  | Distance | Ligand Atom | Protein Atom |
|-------|---------|-----|----------|-------------|--------------|
| 1     | 155A    | PRO | 3.62     | 2149        | 726          |
| 2     | 155A    | PRO | 3.80     | 2150        | 727          |
| 3     | 184A    | LYS | 3.80     | 2153        | 1087         |

**Hydrogen Bonds** —

| Index | Residue | AA  | Distance H-A | Distance D-A | Donor Angle | Protein donor? | Side chain | Donor Atom | Acceptor Atom |
|-------|---------|-----|--------------|--------------|-------------|----------------|------------|------------|---------------|
| 1     | 126A    | GLU | 2.07         | 2.90         | 146.79      | ✓              | ✓          | 372 [O3]   | 2159 [O3]     |
| 2     | 184A    | LYS | 2.21         | 3.20         | 164.97      | ✓              | ×          | 1081 [Nam] | 2158 [O3]     |

**Salt Bridges** ....

| Index | Residue | AA  | Distance | Protein positive? | Ligand Group | Ligand Atoms |
|-------|---------|-----|----------|-------------------|--------------|--------------|
| 1     | 125A    | HIS | 5.16     | ✓                 | Carboxylate  | 2156, 2157   |
| 2     | 157A    | HIS | 5.01     | ✓                 | Carboxylate  | 2156, 2157   |

**b** **Hydrophobic Interactions** ....

| Index | Residue | AA  | Distance | Ligand Atom | Protein Atom |
|-------|---------|-----|----------|-------------|--------------|
| 1     | 125A    | HIS | 3.71     | 2142        | 353          |
| 2     | 155A    | PRO | 3.98     | 2144        | 726          |
| 3     | 157A    | HIS | 3.96     | 2138        | 747          |
| 4     | 166A    | LEU | 3.48     | 2139        | 853          |
| 5     | 177A    | ARG | 3.28     | 2139        | 982          |
| 6     | 181A    | TYR | 3.74     | 2137        | 1039         |
| 7     | 183A    | LEU | 3.74     | 2138        | 1065         |

**Hydrogen Bonds** —

| Index | Residue | AA  | Distance H-A | Distance D-A | Donor Angle | Protein donor? | Side chain | Donor Atom | Acceptor Atom |
|-------|---------|-----|--------------|--------------|-------------|----------------|------------|------------|---------------|
| 1     | 157A    | HIS | 1.94         | 2.92         | 162.13      | ✓              | ×          | 743 [Nam]  | 2145 [O.co2]  |

**Salt Bridges** ....

| Index | Residue | AA  | Distance | Protein positive? | Ligand Group | Ligand Atoms |
|-------|---------|-----|----------|-------------------|--------------|--------------|
| 1     | 157A    | HIS | 4.09     | ✓                 | Carboxylate  | 2145, 2146   |

**Supplementary Figure S5.** PLIP was used to analyze the non-covalent interactions of PobR protein with ligands. (a) The PobR<sup>WT</sup>

protein has three hydrophobic interactions, two hydrogen bonds and two salt bridges with HPP. (b) The PobR<sup>W177R</sup> has seven hydrophobic interactions, one hydrogen bonds and one salt bridges with HPP.

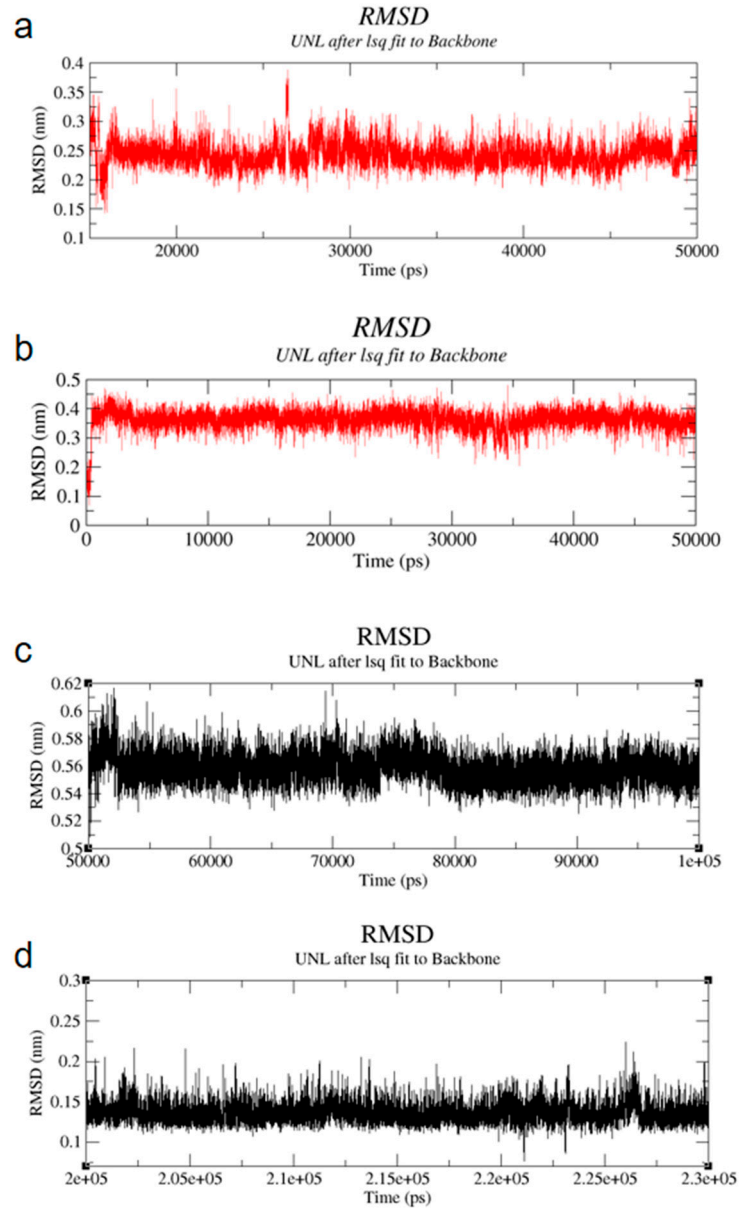

**Supplementary Figure S6.** The stability of the system was preliminarily measured by RMSD curve. (a) The RMSD curve of PobR<sup>WT</sup> to 4HB. (b) The RMSD curve of PobR<sup>W177R</sup> to 4HB. (c) The RMSD curve of PobR<sup>WT</sup> to HPP. (d) The RMSD curve of PobR<sup>W177R</sup> to HPP.

**Supplementary Table S1. Bacterial strains and plasmids used in this study.**

| Strain                                      | Description                                                                                                         | Source                               |
|---------------------------------------------|---------------------------------------------------------------------------------------------------------------------|--------------------------------------|
| DB3.1                                       | <i>F- gyrA462 endA1 glnV44 recA) mcrB mrr hsdS20(rB-, ara14 galK2 lacY1 proA2 rpsL20 Δleumtl1</i>                   | <i>Δ(sr1-mB-(SmR) xyl5</i> Lab stock |
| BW25113Δ <i>codA</i>                        | <i>rrnBT14 ΔlacZWI16 hsdR514 ΔaraBAD<sub>AH33</sub> ΔrhaBAD<sub>LD78</sub>ΔcodA</i>                                 | Lab stock                            |
| plasmid                                     | Description                                                                                                         | Source                               |
| gYB2a-ccdb                                  | <i>Amp<sup>r</sup>, P15A ori, ccdB gene</i>                                                                         | Lab stock                            |
| pYB1a-eGFP-cmr                              | <i>Amp<sup>r</sup>, P15A ori, eGFP gene, Chl<sup>r</sup></i>                                                        | Lab stock                            |
| pUAM-RE-CD                                  | <i>Amp<sup>r</sup>, Anderson J23100-promoter, RE gene, codA gene</i>                                                | Lab stock                            |
| pYP1a- P <sub>pobA</sub> *2- mCherry-sacB   | <i>Amp<sup>r</sup>, P15A ori,two P<sub>pobA</sub> promotor, pobR gene, mCherry gene, sacB gene</i>                  | Lab stock                            |
| gYB2a-P <sub>pobA</sub> *2-mCherry-sacB     | <i>Amp<sup>r</sup>, P15A ori, two P<sub>pobA</sub> promoters, mCherry gene, sacB gene</i>                           | this study                           |
| gYb2a-P <sub>pobA</sub> *2-mCherry-SacB-cmr | <i>Amp<sup>r</sup>, P15A ori,two P<sub>pobA</sub> promotor, mCherry gene, sacB gene, Chl<sup>r</sup></i>            | this study                           |
| gYb2a-P <sub>pobA</sub> *2-mCherry-CD-cmr   | <i>Amp<sup>r</sup>, P15A ori,two P<sub>pobA</sub> promotor, mCherry gene, codA gene, Chl<sup>r</sup></i>            | this study                           |
| gYb2a-P <sub>pobR</sub> -mCherry-CD-cmr     | <i>Amp<sup>r</sup>, P15A ori,two P<sub>pobA</sub> promotor, pobR gene, mCherry gene, codA gene, Chl<sup>r</sup></i> | this study                           |

**Supplementary Table S2. Primers used in this study.**

| Primers           | Sequences (5'-3')                                  |
|-------------------|----------------------------------------------------|
| PpobA*2-mc-0311-F | gagggctctcatccgagacgggtaccATTGGTGATGCTGTTCCAT      |
| Primer 2-0311-R   | ggatctcctgctgtatgtcggaattcttatttgtaactgttaatt      |
| cmr-gibson-0317-F | gatctcctgctgtatgtcggaattcttacgccccgcctgccact       |
| cmr-gibson-0317-R | aattaacagttaacaataagaattcatggagaaaaaatcactgg       |
| CD-gibson-0420-R  | ggtatatccagtgatttttctccatgaattcttaccgttgtaatcgatgg |
| CD-gibson-0420-F  | gtaactcgagaggagatgtcgaataacgctttac                 |
| cmr-Gibson-F      | caaacggtaagaattcatggagaaaaaatcactggatatacc         |
| Mc-Gibson-R       | gacatctcctctcgagttactgtacagctcgtccatg              |
| PobR-P1-BsaI-F    | gtgctgGGTCTCggATGGAACAGCATCACCAATA                 |
| PobR-P2-BsaI-R    | agcgtgGGTCTCTGCTAAACCAAGTTGCGCAGTTCAT              |
